## Decreasing human body temperature in the United States since the Industrial Revolution

Myroslava Protsiv<sup>1</sup>, Catherine Ley<sup>1</sup>, Joanna Lankester<sup>2</sup>, Trevor Hastie<sup>3,4</sup>, Julie Parsonnet<sup>1,5,\*</sup>

### Affiliations:

5 <sup>1</sup>Division of Infectious Diseases and Geographic Medicine, Department of Medicine, Stanford University School of Medicine, Stanford, CA 94305.

<sup>2</sup>Division of Cardiovascular Medicine, Stanford University, School of Medicine CA 94305.

<sup>3</sup>Department of Statistics, Stanford University, Stanford, CA 94305.

10 <sup>4</sup>Department of Biomedical Data Science, Stanford University School of Medicine, Stanford, CA, 94305.

<sup>5</sup>Division of Epidemiology, Department of Health Research and Policy, Stanford University School of Medicine, Stanford, CA, 94305

\*Correspondence to: Julie Parsonnet, 300 Pasteur Dr., Lane L134, Stanford University, Stanford, CA 94305. [parsonnt@stanford.edu](mailto:parsonnt@stanford.edu).

15 **ABSTRACT**

In the US, the normal, oral temperature of adults is, on average, lower than the canonical 37°C established in the 19<sup>th</sup> century. We postulated that body temperature has decreased over time. Using measurements from three cohorts--the Union Army Veterans of the Civil War (N=23,710; measurement years 1860-1940), the National Health and Nutrition Examination Survey I (N=15,301; 1971-1975), and the Stanford Translational Research Integrated Database Environment (N=150,280; 2007-2017)--we determined that mean body temperature in men and women, after adjusting for age, height, weight and, in some models date and time of day, has decreased monotonically by 0.03°C per birth decade. A similar decline within the Union Army cohort as between cohorts, makes measurement error an unlikely explanation. This substantive and continuing shift in body temperature—a marker for metabolic rate—provides a framework for understanding changes in body habitus and human longevity over the last 200 years.

## INTRODUCTION

In 1851, the German physician Carl Reinhold August Wunderlich obtained millions of  
30 axillary temperatures from 25,000 patients in Leipzig, thereby establishing the standard for  
normal human body temperature of 37°C or 98.6 °F (range: 36.2 -37.5 °C [97.2- 99.5 °F]) (1, 2).  
A compilation of 27 modern studies, however (3), reported mean temperature to be uniformly  
lower than Wunderlich’s estimate. Recently, an analysis of more than 35,000 British patients  
with almost 250,000 temperature measurements, found mean oral temperature to be 36.6°C,  
35 confirming this lower value (4). Remaining unanswered is whether the observed difference  
between Wunderlich’s and modern averages represents true change or bias from either the  
method of obtaining temperature (axillary by Wunderlich vs. oral today) or the quality of  
thermometers and their calibration (1). Wunderlich obtained his measurements in an era when  
life expectancy was 38 years and untreated chronic infections such as tuberculosis, syphilis, and  
40 periodontitis afflicted large proportions of the population (5-7). These infectious diseases and  
other causes of chronic inflammation may well have influenced the “normal” body temperature  
of that era.

The question of whether mean body temperature is changing over time is not merely a  
matter of idle curiosity. Human body temperature is a crude surrogate for basal metabolic rate  
45 which, in turn, has been linked to both longevity (higher metabolic rate, shorter life span) and  
body size (lower metabolism, greater body mass). We speculated that the differences observed  
in temperature between the 19<sup>th</sup> century and today are real and that the change over time  
provides important physiologic clues to alterations in human health and longevity since the  
Industrial Revolution.

## RESULTS

In men, we analyzed: a) 83,900 measurements from the Union Army Veterans of the Civil War cohort (UAVCW) obtained between 1862 and 1930, b) 5,998 measurements from the National Health and Nutrition Examination Survey I cohort (NHANES) obtained between 1971 and 1975, and c) 230,261 measurement from the Stanford Translational Research Integrated Database Environment cohort (STRIDE) obtained between 2007 and 2017 (Table 1). We also compared temperature measurements in women within the two later time periods (NHANES I, 9,303 measurements; and STRIDE, 348,006 measurements).

Overall, temperature measurements were significantly higher in the UAVCW cohort than in NHANES, and higher in NHANES than in STRIDE (Figure 1). In each of the three cohorts, and for both men and women, we observed that temperature decreased with age with a similar magnitude of effect (between  $-0.003^{\circ}\text{C}$  and  $-0.0043^{\circ}\text{C}$  per year of age, Figure 1B). As has been previously reported (8), temperature was directly related to weight and inversely related to height, although these associations were not statistically significant in the UAVCW cohort. Analysis using body mass index (BMI) and BMI adjusted for height produced similar results (Supplementary Materials - Table 1) and analyses including only white and black subjects (Figure 1- figure supplement 1) showed similar results to those including subjects of all races.

In both STRIDE and a one-third subsample of NHANES, we confirmed the known relationship between later hour of the day and higher temperature; temperature increased  $0.02^{\circ}\text{C}$  per hour of the day in STRIDE compared to  $0.01^{\circ}\text{C}$  in NHANES (Figure 1B, Supplementary Materials - Table 1; Figure 1 – figure supplement 2). The month of the year had a relatively small, though statistically significant, effect on temperature in all three cohorts, but no consistent pattern emerged (Figure 1 – figure supplement 3). Using approximated ambient temperature for

the date and geographic location of the examination in UAVCW and STRIDE, a rise in ambient  
75 temperature of one degree Celsius correlated with 0.001 degree ( $p < 0.001$ ) and 0.0004 degree  
( $p = 0.013$ ) increases in body temperature in UAVCW and STRIDE, respectively. Because the  
seasonal and climatic effects were small and these independent variables were unavailable for  
many measurements, we omitted month and estimated ambient temperature from further models.

We explored whether chronic infectious diseases—even in the absence of a diagnosis of  
80 fever—might raise temperature in the UAVCW cohort, by assessing the temperatures of men  
reporting a history of malaria ( $N = 2,203$ ), syphilis ( $N = 465$ ), or hepatitis ( $N = 24$ ), or with active  
tuberculosis ( $N = 738$ ), pneumonia ( $N = 277$ ) or cystitis ( $N = 1,301$ ). Only those currently  
diagnosed with tuberculosis or pneumonia had elevated temperatures compared to the remainder  
of the UAVCW population [ $37.22^{\circ}\text{C}$  (95% CI:  $37.20^{\circ}\text{C} - 37.24^{\circ}\text{C}$ ) and  $37.06^{\circ}\text{C}$  (95% CI:  
85  $37.03^{\circ}\text{C} - 37.09^{\circ}\text{C}$ ), respectively compared to  $37.02$  (95% CI:  $36.52 - 37.53$ ) (Supplementary  
Materials - Table 2).

One reason for the lower temperature estimates today than in the past is the difference in  
thermometers or methods of obtaining temperature. To minimize these biases, we examined  
changes in body temperature by birth decade within each cohort under the assumption that the  
90 method of thermometry would not be biased on birth year. Within the UAVCW, we observed a  
significant birth cohort effect, with temperatures in earlier birth decades consistently higher than  
those in later cohorts (Figure 2). With each birth decade, temperature decreased by  
- $0.02^{\circ}\text{C}$ . We then assessed change in temperature over the 200 birth-year span covered by the  
three cohorts. We observed a steady decrease in body temperature by birth cohort for both men  
95 (- $0.59^{\circ}\text{C}$  between birth decades from 1800 to 2000;  $-0.030^{\circ}\text{C}$  per decade) and women ( $-0.32^{\circ}\text{C}$

between 1890 and 2000;  $-0.029$  °C per decade). Black and white men and women demonstrated similar trends over time (Figure 3).

## DISCUSSION

100 In this study, we analyzed 677,423 human body temperature measurements from three different cohort populations spanning 155 years of measurement and 197 birth years. We found that men born in the early 19<sup>th</sup> century had temperatures  $0.59$ °C higher than men today, with a monotonic decrease of  $-0.03$ °C per birth decade. Temperature has also decreased in women by  $-0.32$ °C since the 1890s with a similar rate of decline ( $-0.029$ °C per birth decade). Although one  
105 might posit that the differences among cohorts reflect systematic measurement bias due to the varied thermometers and methods used to obtain temperatures, we believe this explanation to be unlikely. We observed similar temporal change within the UAVCW cohort—in which measurement were presumably obtained irrespective of the subject's birth decade—as we did between cohorts. Additionally, we saw a comparable magnitude of difference in temperature  
110 between two modern cohorts using thermometers that would be expected to be similarly calibrated. Moreover, biases introduced by the method of thermometry (axillary presumed in a subset of UAVCW vs. oral for other cohorts) would tend to underestimate change over time since axillary values typically average one degree Celsius lower than oral temperatures (3, 9). Thus, we believe the observed drop in temperature reflects physiologic differences rather than  
115 measurement bias. Other findings in our study—e.g., increased temperature at younger ages, in women, with increased body mass and with later time of day—support a wealth of other studies dating back to the time of Wunderlich (2, 10).

Resting metabolic rate is the largest component of a typical modern human's energy expenditure, comprising around 65% of daily energy expenditure for a sedentary individual (11).  
120 Heat is a byproduct of metabolic processes, the reason nearly all warm-blooded animals have temperatures within a narrow range despite drastic differences in environmental conditions. Over several decades, studies examining whether metabolism is related to body surface area or body weight (12, 13), ultimately, converged on weight-dependent models (14-16). Since US residents have increased in mass since the mid-19<sup>th</sup> century, we should have correspondingly  
125 expected increased body temperature. Thus, we interpret our finding of a decrease in body temperature as indicative of a decrease in metabolic rate independent of changes in anthropometrics. A decline in metabolic rate in recent years is supported in the literature when comparing modern experimental data to those from 1919 (17).

Although there are many factors that influence resting metabolic rate, change in the  
130 population-level of inflammation seems the most plausible explanation for the observed decrease in temperature over time. Economic development, improved standards of living and sanitation, decreased chronic infections from war injuries, improved dental hygiene, the waning of tuberculosis and malaria infections, and the dawn of the antibiotic age together are likely to have decreased chronic inflammation since the 19<sup>th</sup> century. For example, in the mid-19<sup>th</sup> century, 2-  
135 3% of the population would have been living with active tuberculosis (18). This figure is consistent with the UAWCW Surgeons Records that reported 737 cases of active tuberculosis among 23,757 subjects (3.1%). That UAWCW veterans who reported either current tuberculosis or pneumonia had a higher temperature (0.19°C and 0.03°C respectively) than those without infectious conditions supports this theory (Supplementary Materials - Table 2). Although we  
140 would have liked to have compared our modern results to those from a location with a continued

high risk of chronic infection, we could identify no such database that included temperature measurements. However, a small study of healthy volunteers from Pakistan—a country with a continued high incidence of tuberculosis and other chronic infections—confirms temperature more closely approximating the values reported by Wunderlich (mean, median and mode, respectively, of 36.89°C, 36.94°C, and 37°C) (19).

Reduction in inflammation may also explain the continued drop in temperature observed between the two more modern cohorts: NHANES and STRIDE. Although many chronic infections had been conquered before the NHANES study, some—periodontitis as one example (20)—continued to decrease over this short period. Moreover, the use of anti-inflammatory drugs including aspirin (21), statins (22) and non-steroidal anti-inflammatory drugs (NSAIDs) (23) increased over this interval, potentially reducing inflammation. NSAIDs have been specifically linked to blunting of body temperature, even in normal volunteers (24). In support of declining inflammation in the modern era, a study of NHANES participants demonstrated a 5% decrease in abnormal C-reactive protein levels between 1999 and 2010 (25).

Changes in ambient temperature may also explain some of the observed change in body temperature over time. Maintaining constant body temperature despite fluctuations in ambient temperature consumes up to 50-70% of daily energy intake (26). Resting metabolic rate (RMR), for which body temperature is a crude proxy, increases when the ambient temperature decreases below or rises above the thermoneutral zone, i.e., the temperature of the environment at which humans can maintain normal temperature with minimum energy expenditure (27). In the 19<sup>th</sup> century, homes in the US were irregularly and inconsistently heated and never cooled. By the 1920s, however, heating systems reached a broad segment of the population with mean nighttime temperature continuing to increase even in the modern era (28). Air conditioning is now



found in more than 85% of U.S. homes (29). Thus, the amount of time the population has spent  
165 at thermoneutral zones has markedly increased, potentially causing a decrease in RMR, and, by  
analogy, body temperature.

Some factors known to influence body temperature were not included in our final model  
due to missing data (ambient temperature and time of day) or complete lack of information (dew  
point)(4). Adjusting for ambient temperature, however, would likely have amplified the changes  
170 over time due to lack of heating and cooling in the earlier cohorts. Time of day at which  
measurement was conducted had a more significant effect on temperature (Figure 1 – figure  
supplement 2). Based on the distribution of times of day for temperature measurement available  
to us in STRIDE and NHANES, we estimate that even in the worst case scenario, i.e., the  
UAVCW measurements were all were obtained late in the afternoon, adjustment for time of day  
175 would have only a small influence ( $<0.05^{\circ}\text{C}$ ) on the  $-0.59^{\circ}\text{C}$  change over time.

In summary, normal body temperature is assumed by many, including a great  
preponderance of physicians, to be  $37^{\circ}\text{C}$ . Those who have shown this value to be too high have  
concluded that Wunderlich's 19<sup>th</sup> century measurements were simply flawed (1, 3). Our  
investigation indicates that humans in high-income countries have changed physiologically over  
180 the last 200 years with a mean body temperature 1.6% lower than in the pre-industrial era. The  
role that this physiologic “evolution” plays in human anthropometrics and longevity is unknown.

## MATERIALS AND METHODS

### Cohorts

185 We compared body temperature measurements from three cohorts. Cohort 1: The Union  
Army Veterans of the Civil War, 1860-1940 (UAVCW) is comprised of data abstracted from the

Compiled Military Service Record, the Pension Records, Carded Medical Records, the Surgeons  
Certificates (detailed medical records) and the US Federal Census for 331 companies of white  
and 52 companies of black Union Army veterans. Temperatures, which were recorded on  
190 83,900 Surgeons Certificates determining eligibility for pension benefits, could have been  
obtained on multiple occasions from any individual veteran. Mercury thermometers were used  
but it was not recorded whether the temperatures were taken orally or in the axilla. Both  
methods were employed in the 19<sup>th</sup> century although oral temperature was more common (30).  
The UAWCW data—including birth date, temperature, height, weight, location and date of the  
195 medical visit, medical history, ongoing medical complaints and findings of physical  
examinations—were extracted and made available in a digital format by Fogel et al (31).

Cohort 2: The National Health and Nutrition Examination Survey (NHANES I) is a multistage,  
national probability survey conducted between 1971 and 1975 in the US civilian population. A  
subset of subjects, aged 1 to 74 years (N= 23,710) underwent a medical examination (ICPSR  
200 study No. 8055), including 15,301 adults. The major focus of NHANES I was nutrition, and  
persons with low income, pregnant women and the elderly were consequently oversampled (32).  
Data abstracted included weight, height, sex, race, and month and geographic region of  
examination and, as available, time of day the temperature was obtained. In NHANES, mercury  
thermometers were used and temperatures were taken orally. The medical examination was  
205 performed by a physician with the help of a nurse. Cohort 3: The Stanford Translational  
Research Integrated Database Environment (STRIDE) extracts electronic medical record  
information from patient encounters at Stanford Health Care (Stanford, CA). All adult outpatient  
encounters at Stanford Health Care from 2007 to 2017 with recorded temperature measurements  
in the electronic medical record are included in this study (N=578,522 adult outpatient

210 encounters). Temperature measurements were obtained orally with a digital thermometer and  
extracted from the dataset along with age, sex, weight, height, primary concern at the visit,  
prescribed medications, other conditions in the health record with ICD10 codes, and year and  
time of day the temperature was obtained.

For the UAVCW and STRIDE datasets, any observations having a diagnosis of fever at  
215 the time of the medical examination were excluded. From all three datasets, any extreme values  
of temperature ( $<35^{\circ}\text{C}$  and  $>39^{\circ}\text{C}$ ) were also excluded from the analysis either because they  
were implausible or because they indicated a diagnosis of fever and would otherwise have been  
excluded. Improbable values of both body weight ( $<30\text{kg}$  and  $>200\text{ kg}$ ) and height ( $< 120\text{ cm}$   
and  $>220\text{ cm}$ ) were also removed. In the UAVCW, we also excluded veterans born after 1850,  
220 because they were unlikely to have served in the Union Army.

The use of the STRIDE data was approved as an expedited protocol by the Stanford  
Institutional Review Board (protocol 40539) and informed consent was waived since the only  
personal health information abstracted was month of clinic visit. Anonymized data from  
NHANES and the data from UAVCW are freely available on-line for research use.

## 225 **Data analysis**

Race categories were defined differently across cohorts. UAVCW included only white  
and black men. For comparability, we restricted analyses between the UAVCW and other  
cohorts to men in these two racial groups. Asians were categorized as “Other” in NHANES I and  
as “Asian” in STRIDE, so were considered as “Other race” in combined analyses. We performed  
230 analyses stratified by sex to account for known temperature differences between men and  
women. The NHANES I study uses sample weights to account for its design; these were  
incorporated into models including NHANES data (32).

To estimate the average body temperature during each of the three time periods, we modeled temperature within each cohort using multivariate linear regression, simultaneously  
235 assessing the effects of age, body weight, and height. Measurements in men and women were analyzed separately, by white and black racial groups.

To evaluate temperature changes over time, we predicted body temperature using multivariate linear regression including age, body weight, height and birth decade in the UAVCW cohort (the timeframe of NHANES I and STRIDE spanned relatively few years, with  
240 insufficient variability to evaluate birth cohort effects within these datasets). To assess change in temperature over the 200 birth-year span covered by the three cohorts (between years 1800 and 2000 for men, and between 1890 and 2000 for women), we used linear regression with temperature as the outcome and age, weight, height, and birth decade as independent variables, stratifying by race and sex. The UAVCW cohort was further investigated for reported infectious  
245 conditions that might affect temperature. Diagnoses of infectious conditions, either in the medical history (malaria, syphilis, hepatitis) or active at the time of examination (tuberculosis, pneumonia or cystitis), were included in regression models if fever was not listed as part of that record.

Some models included time of day, ambient temperature and month of year. Time of day  
250 at which temperature was taken was available for STRIDE and a subset of NHANES. For individuals without time of day, we imputed the time to be 12:00 PM (noon). We accounted for ambient temperature using the date and geographic location of examination (available in UAVCW and STRIDE) based on data from the National Centers for Environmental Information (33). We used the month of year when each measurement was taken as a random effect. To  
255 assess the robustness of our result to the chosen methodology, we repeated the analyses using

linear mixed effect modeling, adjusting for multiple measurements.

260 Within the UAVCW, minimum ages varied across birth cohorts due to the bias inherent in the cohort structure (for example, it is impossible to be younger than 30 years of age at the time of the pension visit, be born in 1820s, and be a veteran of the Civil War). To avoid instability in the analysis due to having too few people within specific age groups per birth decade, we excluded the lowest 1% of observations in each birth cohort according to age.

265 All analyses were performed using R statistical software version 3.3.0. and packages easyGgplot2, lme4, merTools, and ggplot2 for statistical analysis and graphs [([www.r-project.org](http://www.r-project.org))].

## ACKNOWLEDGEMENTS

270 We thank Professor Dora Costa, University of California Los Angeles and Dr Louis Nguyen, Harvard Medical School for sharing their expertise and knowledge of the Union Army data. Thank you also to Dr. Philip Mackowiak, University of Maryland, for providing feedback on study design, analysis and interpretation. We also thank Michelle Bass, PhD, and Yelena Nazarenko for their support with open dataset identification and the STRIDE clinical databases, respectively. **Funding:** Funding for this project was provided by a Stanford Center for Clinical and Translational Research and Education (SPECTRUM) grant, “Mining the EMR and extant population data sets to define normal human body temperature over time”. Curation of the Union Army data was conducted under the auspices of NIH grant number P01 AG10120, Early Indicators of Later Work Levels, Disease and Death, Dora L. Costa, Principal Investigator.

**Author contributions:** conceptualization: JP; literature search: MP, JL, JP; data curation: MP; methodology: TH, JP, MP, CL, JL; formal analysis: MP, CL, TH; data interpretation: MP, CL,

TH, JL, JP; resources, oversight and leadership: JP; programming: MP; figures: MP, TH, JP;  
280 writing – original draft: MP ; critical review and editing: CL, JL, TH, JP. **Competing interests:**  
Authors declare no competing interests. **Data and materials availability:** All data generated or  
analyzed during this study are included in the manuscript and supporting files. **Competing**  
**interests:** None of the authors has financial or non-financial competing interests.

## 285 REFERENCES

1. Mackowiak PA. History of clinical thermometry. In: Mackowiak PA, editor. Fever: Basic Mechanisms and Management. Philadelphia: Lippincott-Raven; 1997. p. 1-10.
2. Wunderlich CA, Sequin E. Medical Thermometry, and Human Temperature. New York: William Wood & Company; 1871.
- 290 3. Sund-Levander M, Forsberg C, Wahren LK. Normal oral, rectal, tympanic and axillary body temperature in adult men and women: a systematic literature review. Scand J Caring Sci. 2002;16(2):122-8.
4. Obermeyer Z, Samra JK, Mullainathan S. Individual differences in normal body temperature: longitudinal big data analysis of patient records. Bmj-British Medical Journal. 295 2017;359. DOI: 10.1136/bmj.j5468.
5. Murray JF, Schraufnagel DE, Hopewell PC. Treatment of Tuberculosis. A Historical Perspective. Ann Am Thorac Soc. 2015;12(12):1749-59. DOI: 10.1513/AnnalsATS.201509-632PS.
6. Tampa M, Sarbu I, Matei C, Benea V, Georgescu SR. Brief history of syphilis. J Med Life. 300 2014;7(1):4-10.

7. Richmond D. No Teeth, No Man: Dentistry during the Civil War: Jamco Films; 2017  
[Available from: <http://civilwarrx.blogspot.com/2014/08/no-teeth-no-man-dentistry-during-civil.html#>.
8. Eriksson H, Svardsudd K, Larsson B, Welin L, Ohlson LO, Wilhelmsen L. Body  
305 temperature in general population samples. The study of men born in 1913 and 1923. Acta  
Med Scand. 1985;217(4):347-52.
9. Niven DJ, Gaudet JE, Laupland KB, Mrklas KJ, Roberts DJ, Stelfox HT. Accuracy of  
Peripheral Thermometers for Estimating Temperature A Systematic Review and Meta-  
analysis. Ann Intern Med. 2015;163(10):768-+. DOI: 10.7326/m15-1150.
- 310 10. Waalen J, Buxbaum JN. Is Older Colder or Colder Older? The Association of Age With  
Body Temperature in 18,630 Individuals. Journals of Gerontology Series a-Biological  
Sciences and Medical Sciences. 2011;66(5):487-92. DOI: 10.1093/gerona/glr001.
11. Heymsfield SB, Harp JB, Rowell PN, Nguyen AM, Pietrobelli A. How much may I eat?  
Calorie estimates based upon energy expenditure prediction equations. Obes Rev.  
315 2006;7(4):361-70. DOI: 10.1111/j.1467-789X.2006.00249.x.
12. Du Bois EF. Basal metabolism in health and disease. 3d ed. Philadelphia,: Lea & Febiger;  
1936. 494 p. p.
13. Kleiber M. A new Newton's law of cooling? Science. 1972;178(4067):1283-5.
14. Mifflin MD, St Jeor ST, Hill LA, Scott BJ, Daugherty SA, Koh YO. A new predictive  
320 equation for resting energy expenditure in healthy individuals. Am J Clin Nutr.  
1990;51(2):241-7.
15. Schofield WN. Predicting basal metabolic rate, new standards and review of previous  
work. Hum Nutr Clin Nutr. 1985;39 Suppl 1:5-41.

16. Nelson KM, Weinsier RL, Long CL, Schutz Y. Prediction of resting energy expenditure  
325 from fat-free mass and fat mass. *Am J Clin Nutr.* 1992;56(5):848-56.
17. Frankenfield D, Roth-Yousey L, Compher C. Comparison of predictive equations for  
resting metabolic rate in healthy nonobese and obese adults: a systematic review. *J Am  
Diet Assoc.* 2005;105(5):775-89. DOI: 10.1016/j.jada.2005.02.005.
18. Tiemersma EW, van der Werf MJ, Borgdorff MW, Williams BG, Nagelkerke NJ. Natural  
330 history of tuberculosis: duration and fatality of untreated pulmonary tuberculosis in HIV  
negative patients: a systematic review. *PLoS One.* 2011;6(4):e17601. DOI:  
10.1371/journal.pone.0017601.
19. Adhi M, Hasan R, Noman F, Mahmood SF, Naqvi A, Rizvi AU. Range for normal body  
temperature in the general population of Pakistan. *J Pak Med Assoc.* 2008;58(10):580-4.
- 335 20. Capilouto ML, Douglass CW. Trends in the prevalence and severity of periodontal diseases  
in the US: a public health problem? *J Public Health Dent.* 1988;48(4):245-51.
21. Luepker RV, Steffen LM, Duval S, Zantek ND, Zhou X, Hirsch AT. Population Trends in  
Aspirin Use for Cardiovascular Disease Prevention 1980-2009: The Minnesota Heart  
Survey. *J Am Heart Assoc.* 2015;4(12). DOI: 10.1161/JAHA.115.002320.
- 340 22. Salami JA, Warraich H, Valero-Elizondo J, Spatz ES, Desai NR, Rana JS, Virani SS,  
Blankstein R, Khera A, Blaha MJ, Blumenthal RS, Lloyd-Jones D, Nasir K. National  
Trends in Statin Use and Expenditures in the US Adult Population From 2002 to 2013:  
Insights From the Medical Expenditure Panel Survey. *JAMA Cardiol.* 2017;2(1):56-65.  
DOI: 10.1001/jamacardio.2016.4700.



- 345 23. Lamont EB, Dias LE. Secular changes in NSAID use and invasive colorectal cancer incidence: an ecological study. *Cancer J*. 2008;14(4):276-7. DOI: 10.1097/PPO.0b013e318182ee67.
24. Murphy PJ, Myers BL, Badia P. Nonsteroidal anti-inflammatory drugs alter body temperature and suppress melatonin in humans. *Physiol Behav*. 1996;59(1):133-9.
- 350 25. Ong KL, Allison MA, Cheung BM, Wu BJ, Barter PJ, Rye KA. Trends in C-reactive protein levels in US adults from 1999 to 2010. *Am J Epidemiol*. 2013;177(12):1430-42. DOI: 10.1093/aje/kws443.
26. Levine JA. Nonexercise activity thermogenesis--liberating the life-force. *J Intern Med*. 2007;262(3):273-87. DOI: 10.1111/j.1365-2796.2007.01842.x.
- 355 27. Erikson H, Krog J, Andersen KL, Scholander PF. The critical temperature in naked man. *Acta Physiol Scand*. 1956;37(1):35-9. DOI: 10.1111/j.1748-1716.1956.tb01339.x.
28. Mavrogianni A, Johnson F, Ucci M, Marmot A, Wardle J, Oreszczyn T, Summerfield A. Historic Variations in Winter Indoor Domestic Temperatures and Potential Implications for Body Weight Gain. *Indoor Built Environ*. 2013;22(2):360-75. DOI: 10.1177/1420326X11425966.
- 360 29. U.S. Energy Information Administration. Residential Energy Consumption Survey (RECS) Washington, D.C.: U.S. Energy Information Administration; 2011 [Available from: <https://www.eia.gov/consumption/residential/reports/2009/air-conditioning.php>].
30. Salinger JL, Kalteyer FJ. *Symptomatology and Semeiology*. Modern Medicine. Philadelphia: W.B. Saunders and Co.; 1900. p. 17-48.
- 365 31. Fogel RW, Costa DL, Haines M, Lee C, Nguyen L, Pope C, Rosenberg I, Scrimshaw N, Trussell J, Wilson S, Wimmer LT, Kim J, Bassett J, Burton J, Yetter N. Aging of Veterans

- of the Union Army:Version M-5. In: Center for Population Economics, University of  
Chicago Graduate School of Business, Department of Economics, Brigham Young  
370 University, National Bureau of Economic Research, editors. Chicago 2000.
32. Centers for Disease Control, National Center for Health Statistics. National Health and  
Nutrition Examination Survey Data, 1971-1974. In: US Department of Health and Human  
Services, Centers for Disease Control and Prevention, editors. Hyattsville, MD1975.
33. NOAA National Centers for Environmental Information. Climate at a Glance: Statewide  
375 Times Series 2018 [Available from: <https://www.ncdc.noaa.gov/cag/>].

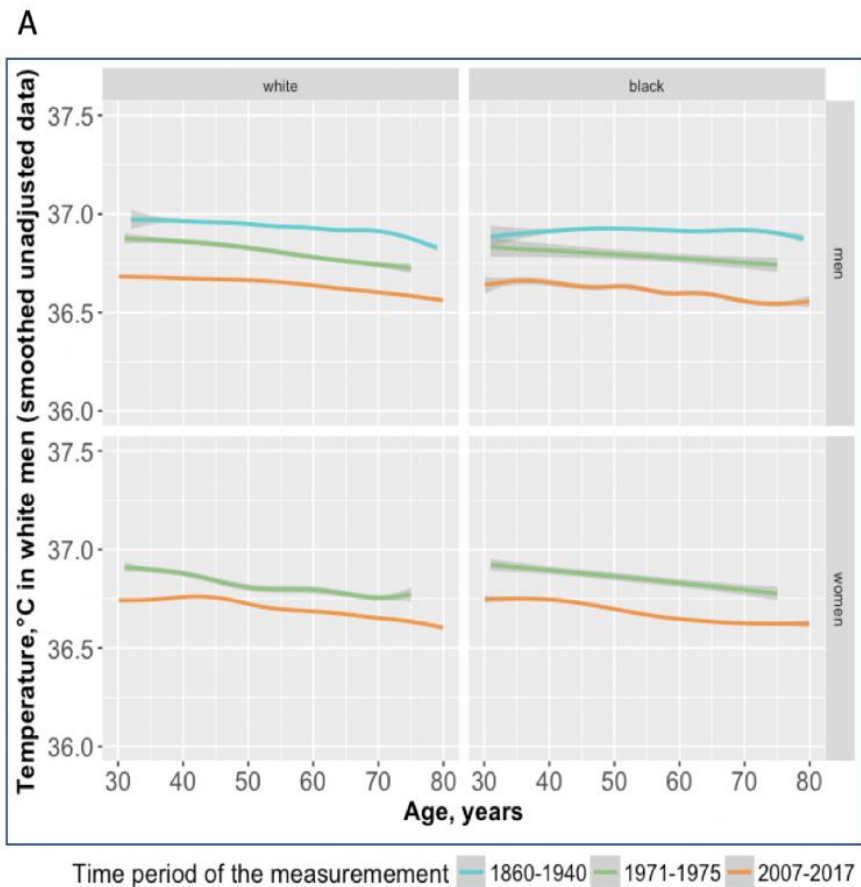

**B**

|                         | Coefficient (Standard error) |                     |                    |                     |                    |
|-------------------------|------------------------------|---------------------|--------------------|---------------------|--------------------|
|                         | UAVCW<br>1860-1940           | NHANES<br>1971-1975 |                    | STRIDE<br>2007-2017 |                    |
|                         |                              | Men                 | Women              | Men                 | Women              |
| Intercept               | 37.14<br>(0.025)             | 37.73<br>(0.18)     | 36.80<br>(0.18)    | 36.67<br>(0.02)     | 36.79<br>(0.02)    |
| Age (yrs)               | -0.003<br>(0.0001)           | -0.003<br>(0.0005)  | -0.003<br>(0.0006) | -0.003<br>(0.0001)  | -0.004<br>(0.0001) |
| Weight (kg)             | -0.0002<br>(0.0001)          | 0.0009<br>(0.0005)  | 0.0006<br>(0.0004) | 0.001<br>(0.0001)   | 0.0007<br>(0.0001) |
| Height (cm)             | 0.0001<br>(0.0002)           | -0.0003<br>(0.001)  | -0.002<br>(0.001)  | -0.002<br>(0.0001)  | -0.001<br>(0.0001) |
| Race Black              | -0.021<br>(0.002)            | -0.001<br>(0.023)   | 0.01<br>(0.02)     | -0.06<br>(0.003)    | -0.05<br>(0.002)   |
| Other                   | NA                           | 0.118<br>(0.066)    | 0.054<br>(0.075)   | -0.009<br>(0.002)   | -0.0075<br>(0.002) |
| Time of day             | NA                           | 0.012<br>(0.016)    | 0.001<br>(0.002)   | 0.02<br>(0.0003)    | 0.02<br>(0.0002)   |
| Adjusted R <sup>2</sup> | 0.01                         | 0.05                | 0.03               | 0.05                | 0.05               |

**C**

|             | Modeled temperature, Age 30 years, weight 70 kg and height 170 cm |                        |                        |
|-------------|-------------------------------------------------------------------|------------------------|------------------------|
|             | UAVCW<br>1860-1940                                                | NHANES<br>1971-1975    | STRIDE<br>2007-2017    |
| Black Men   | 37.01<br>(37.01-37.02)                                            | 36.85<br>(36.83-36.88) | 36.62<br>(36.61-36.63) |
| White Men   | 37.03<br>(37.03-37.04)                                            | 36.83<br>(36.80-36.86) | 36.68<br>(36.68-36.68) |
| Black Women | NA                                                                | 36.87<br>(36.82-36.92) | 36.72<br>(36.71-36.72) |
| White Women | NA                                                                | 36.86<br>(36.83-36.89) | 36.77<br>(36.77-36.77) |

380

**Figure 1. Body temperature measurements by age as observed in three different time periods: 1860-1940 (UAVCW), 1971-1975 (NHANES 1), and 2007-2017 (STRIDE).**

**A** Unadjusted data (local regression) for temperature measurements, showing a decrease in temperature across age in white men, black men, white women, and black women, in the three cohorts. **B.** Coefficients and standard errors from multivariate linear regression models for each cohort including age, weight, height, race group and time of day as. Results of two STRIDE models are presented with and without time of day of temperature measurement. Yellow cells are statistically significant at a p value of <0.01, orange cells are of borderline significance (p<0.1 but >0.05), and remaining uncolored cells are not statistically significant. **C.** Expected body temperature for 30-year old men and women with weight 70 kg and height 170 cm in each time period/cohort. (See also Figure 1 – figure supplements 1-3.)

385

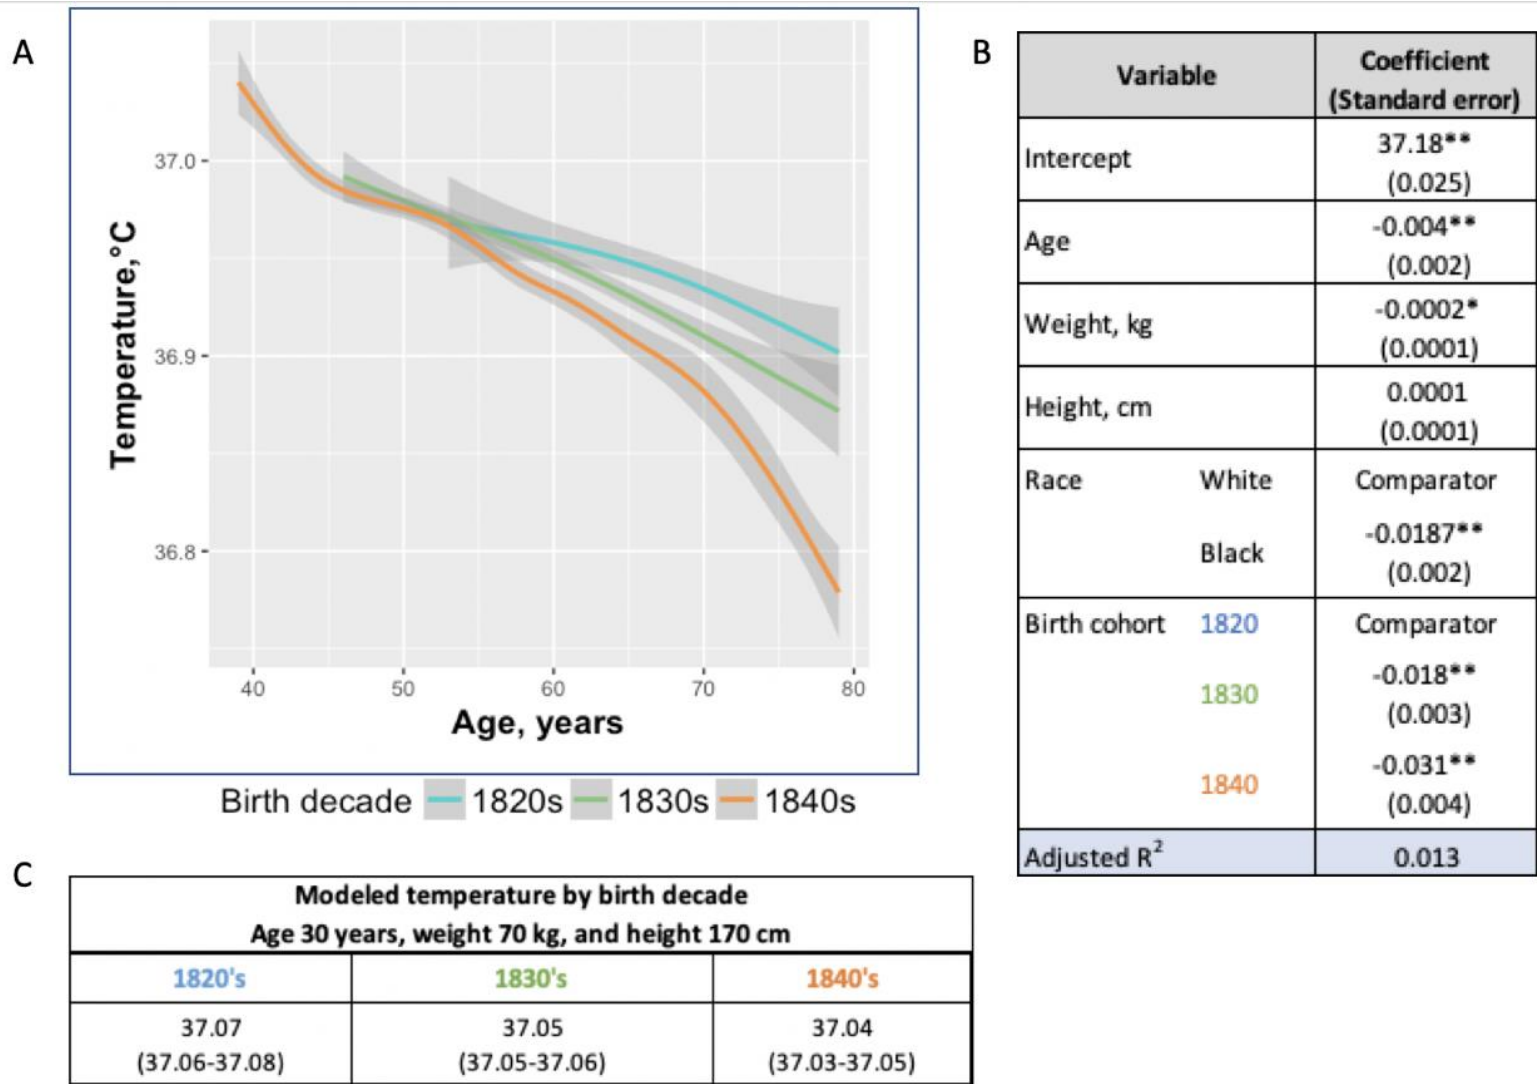

390 **Figure 2: Temperature trends within birth cohorts of the UAVCW, 1860-1940 (black and white men).**  
 A. Smoothed unadjusted data (local regression) for temperature measurement trends within birth cohorts. The different colors represent  
 different birth cohorts (green: 1820s, blue: 1830s, orange: 1840s). B. Coefficients (and standard errors) from multivariate linear regression  
 including age, body weight, height and decade of birth (1820-1840) (these coefficients do not correspond to the graph in Figure 2A as here the  
 trajectories are approximated by linear functions). Only the three birth cohorts with more than 8000 members are included. \* and \*\* indicate  
 395 significance at the 90%, and 99% level, respectively. C. Expected body temperature (and associated 95% confidence interval) for 30-year old  
 men with body weight 70 kg and height 170 cm in each birth cohort. These values derive from the regression models presented in B.

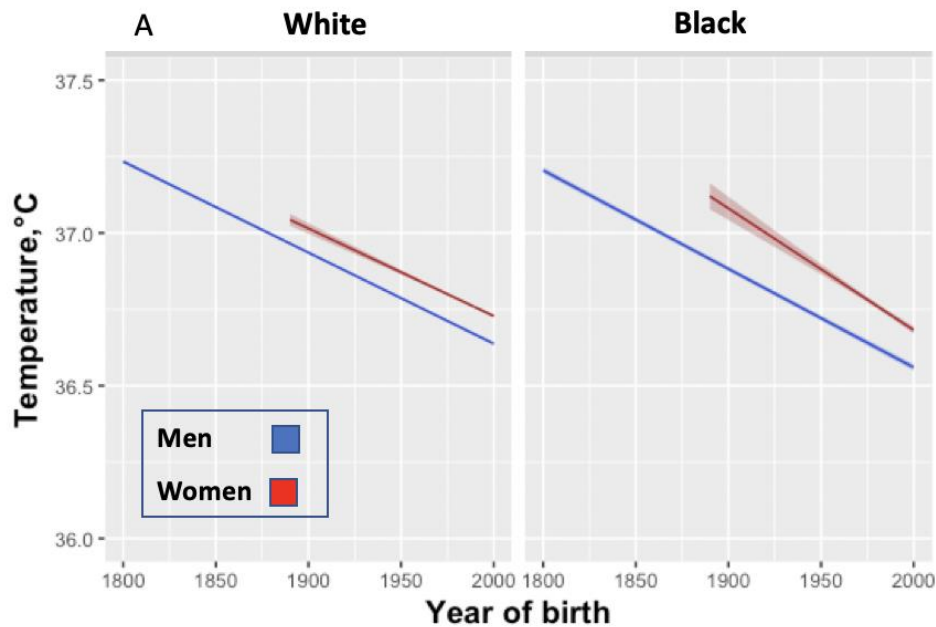

| B                       | Coefficient (Standard error) |                     |                     |                     |
|-------------------------|------------------------------|---------------------|---------------------|---------------------|
|                         | White                        |                     | Black               |                     |
|                         | Men                          | Women               | Men                 | Women               |
| Intercept               | 37.60<br>(0.020)             | 37.65<br>(0.030)    | 37.46<br>(0.039)    | 38.04<br>(0.068)    |
| Age (yrs)               | -0.0060<br>(0.0001)          | -0.0066<br>(0.0001) | -0.0054<br>(0.0001) | -0.0086<br>(0.0003) |
| Weight (kg)             | 0.001<br>(0.0001)            | 0.0008<br>(0.0001)  | 0.0004<br>(0.0001)  | 0.0004<br>(0.0001)  |
| Height (cm)             | -0.0015<br>(0.0001)          | -0.0012<br>(0.0001) | -0.0007<br>(0.0002) | -0.0019<br>(0.0003) |
| Birth year              | -0.0030<br>(0.0001)          | -0.0029<br>(0.0001) | -0.0032<br>(0.0001) | -0.0040<br>(0.0002) |
| Adjusted R <sup>2</sup> | 0.19                         | 0.03                | 0.27                | 0.05                |

**Figure 3: Modeled body temperature over time in three cohorts by birth year (black and white race groups).**

**A.** Body temperature decreases by birth year in white and black men and women. No data for women were available for the birth years from 1800-1890. **B.** Coefficients (and standard errors) used for the graph from multivariate linear regression including age, body weight, height and birth year. All cells are significant at greater than 99% significance level.

**Table 1: Demographic characteristics (N (%)) of cohort members included in the analyses.**

|                           | <b>Total , N (%)</b> | <b>UAVCW</b>  | <b>NHANES I</b> | <b>STRIDE</b> |
|---------------------------|----------------------|---------------|-----------------|---------------|
| Individuals               | 189,338 (100%)       | 23,710 (13%)  | 15,301 (8%)     | 150,280 (79%) |
| Observations <sup>1</sup> | 677,423 (100%)       | 83,699 (12%)  | 15,301 (2%)     | 578,222 (85%) |
| Age (years)               |                      |               |                 |               |
| 20-40                     | 144,379 (21%)        | 1,682 (2%)    | 6,489 (42%)     | 136,181 (24%) |
| 40-60                     | 283,059 (42%)        | 52,117 (62%)  | 4,422 (29%)     | 225,365 (39%) |
| 60-80                     | 249,985 (37%)        | 28,900 (35%)  | 4,390 (29%)     | 216,676 (37%) |
| Weight (Kg)               | 0 (0%)               | 0 (0%)        | 0 (0%)          | 0 (0%)        |
| > 60                      | 123,931 (18%)        | 16,147 (19%)  | 4,245 (28%)     | 103,516 (18%) |
| 60-80                     | 296,244 (44%)        | 57,475 (69%)  | 7,311 (48%)     | 231,312 (40%) |
| 80-100                    | 175,598 (26%)        | 9,054 (11%)   | 3,115 (20%)     | 163,402 (28%) |
| >100                      | 81,650 (12%)         | 1,023 (1%)    | 630 (4%)        | 79,992 (14%)  |
| Height (cm)               |                      |               |                 |               |
| <160                      | 145,964 (64%)        | 2,587 (3%)    | 4,077 (27%)     | 139,295 (24%) |
| 160-180                   | 432,404 (64%)        | 69,506 (83%)  | 9,995 (65%)     | 352,762 (61%) |
| 180-200                   | 98,320 (15%)         | 11,569 (14%)  | 1,227 (8%)      | 85,470 (15%)  |
| > 200                     | 735 (0%)             | 37 (0%)       | 2 (0%)          | 695 (0%)      |
| Sex                       |                      |               |                 |               |
| Women <sup>2</sup>        | 357,309 (53%)        | 0 (0%)        | 9,303 (61%)     | 348,006 (60%) |
| Men                       | 320,114 (47%)        | 83,699 (100%) | 5,998 (39%)     | 230,216 (40%) |
| Race                      |                      |               |                 |               |
| Black                     | 68,955 (10%)         | 20,801 (25%)  | 2,399 (16%)     | 45,689 (8%)   |
| White                     | 381,330 (56%)        | 62,898 (75%)  | 12,716 (83%)    | 305,581 (53%) |
| Other                     | 78,277 (12%)         | 0 (0%)        | 186 (1%)        | 78,091 (14%)  |
| Unknown                   | 148,861 (22%)        | 0 (0%)        | 0 (0%)          | 148,861 (26%) |

UAVCW: Union Army Veterans of the Civil War; NHANES: National Health and Nutrition

405 Examination Survey I; STRIDE: Stanford Translational Research Integrated Database

Environment; BMI: body mass index. <sup>1</sup> Between one and three temperature measurements were available per person. <sup>2</sup> UAVCW included men only.

## ADDITIONAL INFORMATION

- Figure Supplements: Figure 1 - figure supplements 1-3
- 410
- Supplementary Materials - Tables 1 and 2
